# Supplementary material
Source: PubMed Central journal article supplement (PMC5338539)

### Di-nuc bias for individuals D42 Thymus, D4 Thymus

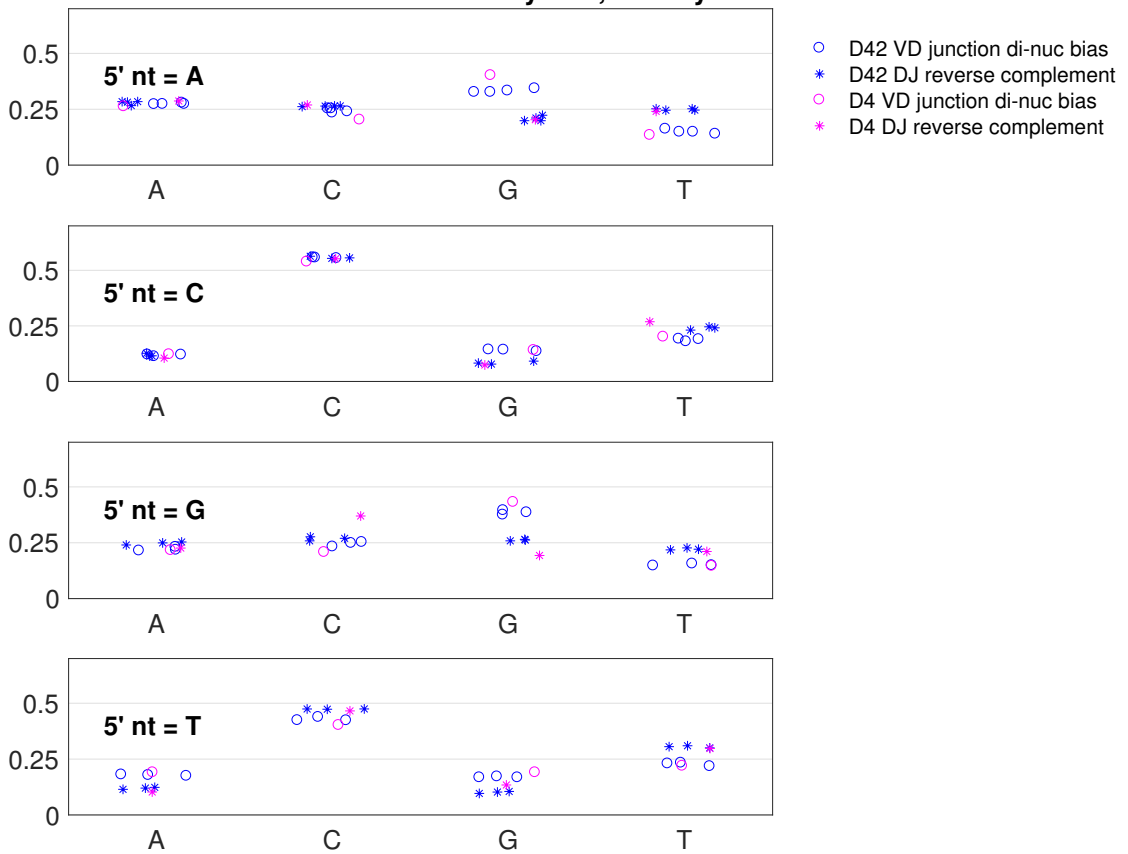

### Predicted vs Observed tri-nucleotide frequencies (D42 thymus)

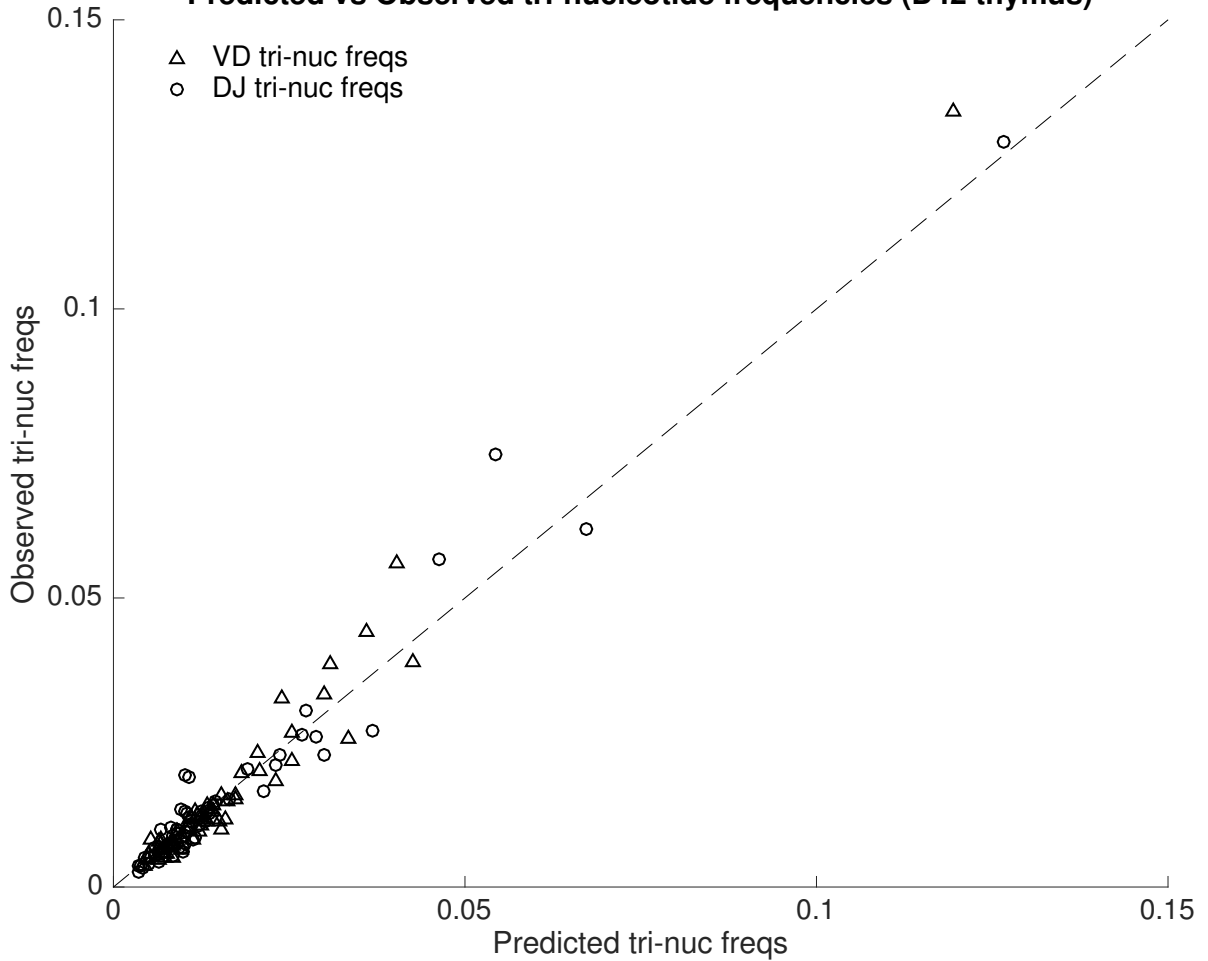

Supplement: pnas.1700241114.sfig05.pdf [file pnas.1700241114.sfig05.pdf]
