# Supplementary material
Source: PubMed Central journal article supplement (PMC5338539)
Supplement: pnas.1700241114.sfig07.pdf [file pnas.1700241114.sfig07.pdf]

D42 thymus, m3  
D42 blood, m1  
D42 thymus, m3  
D42 blood, m3  
E17 thymus, m3  
E17 thymus, m2

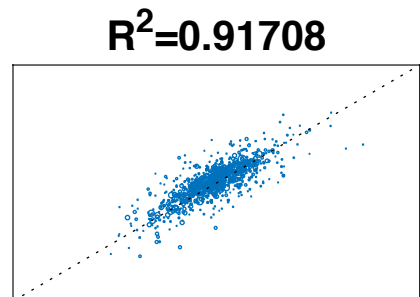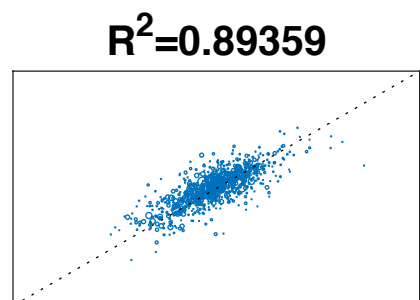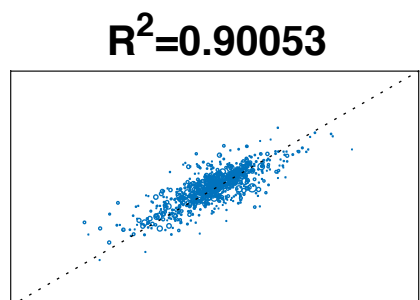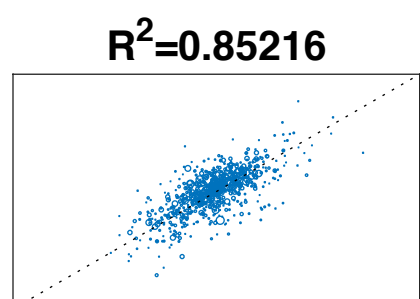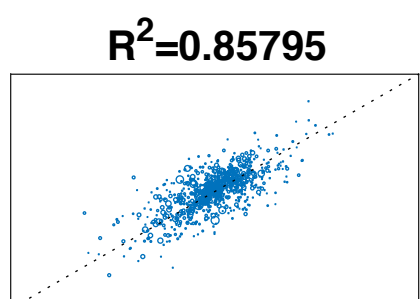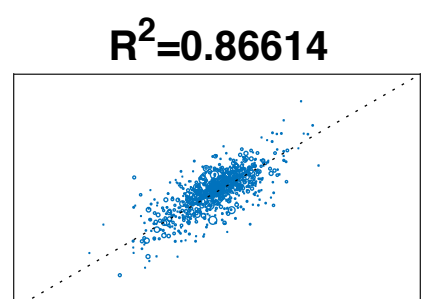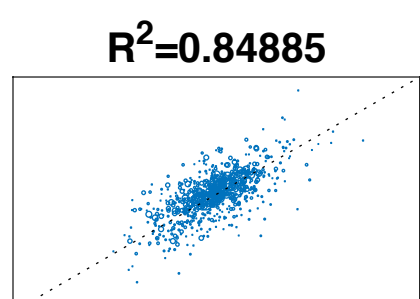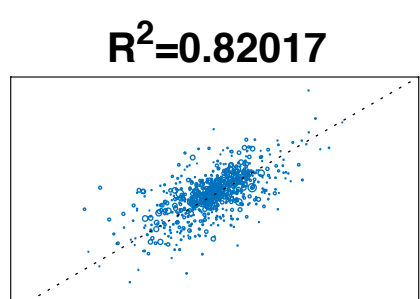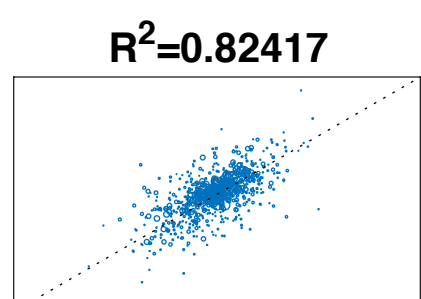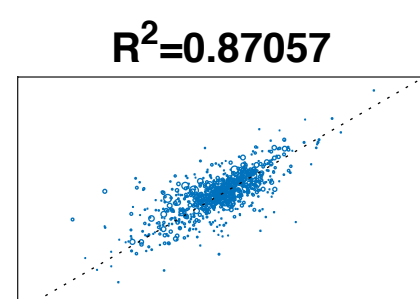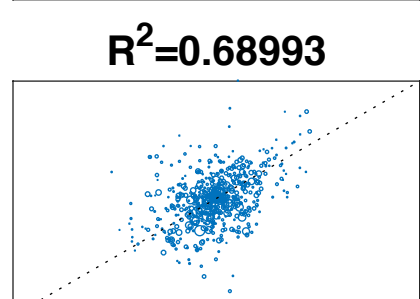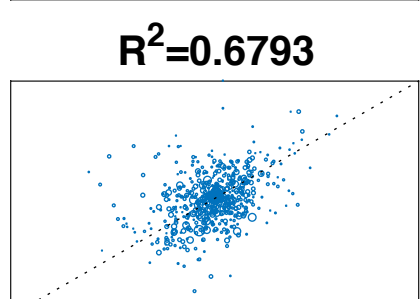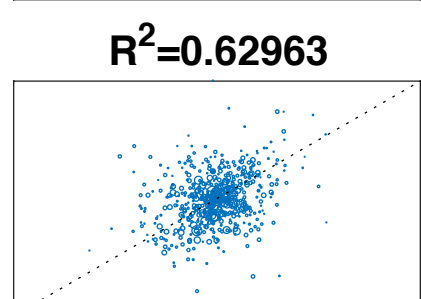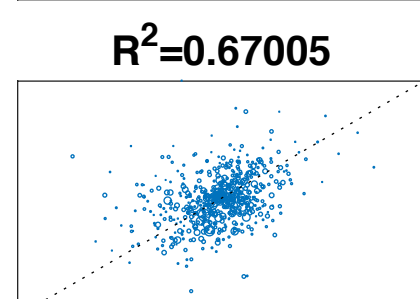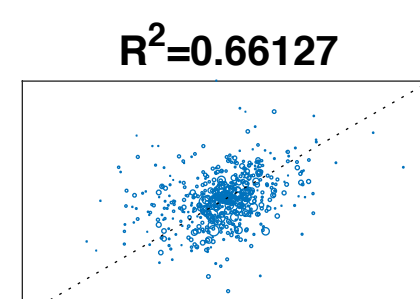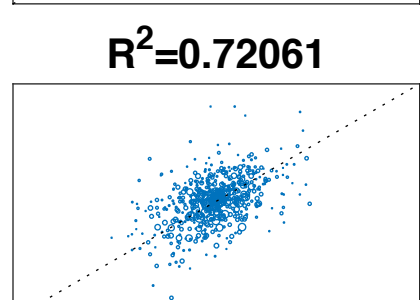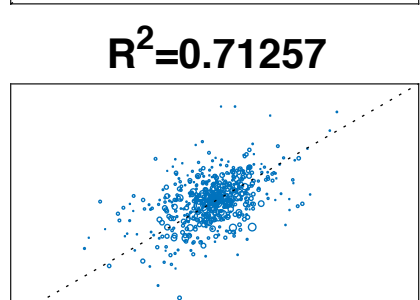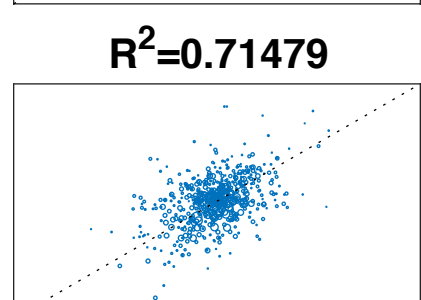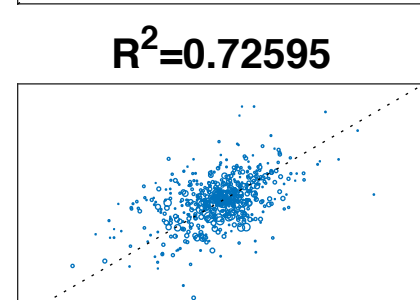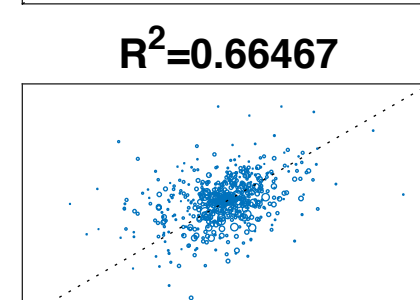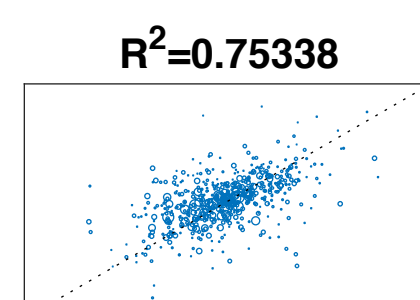

D42 thymus, m1

D42 thymus, m2

D42 thymus, m3

D42 blood, m1

D42 blood, m3

E17 thymus, m2
