# Supplementary material
Source: PubMed Central journal article supplement (PMC5338539)

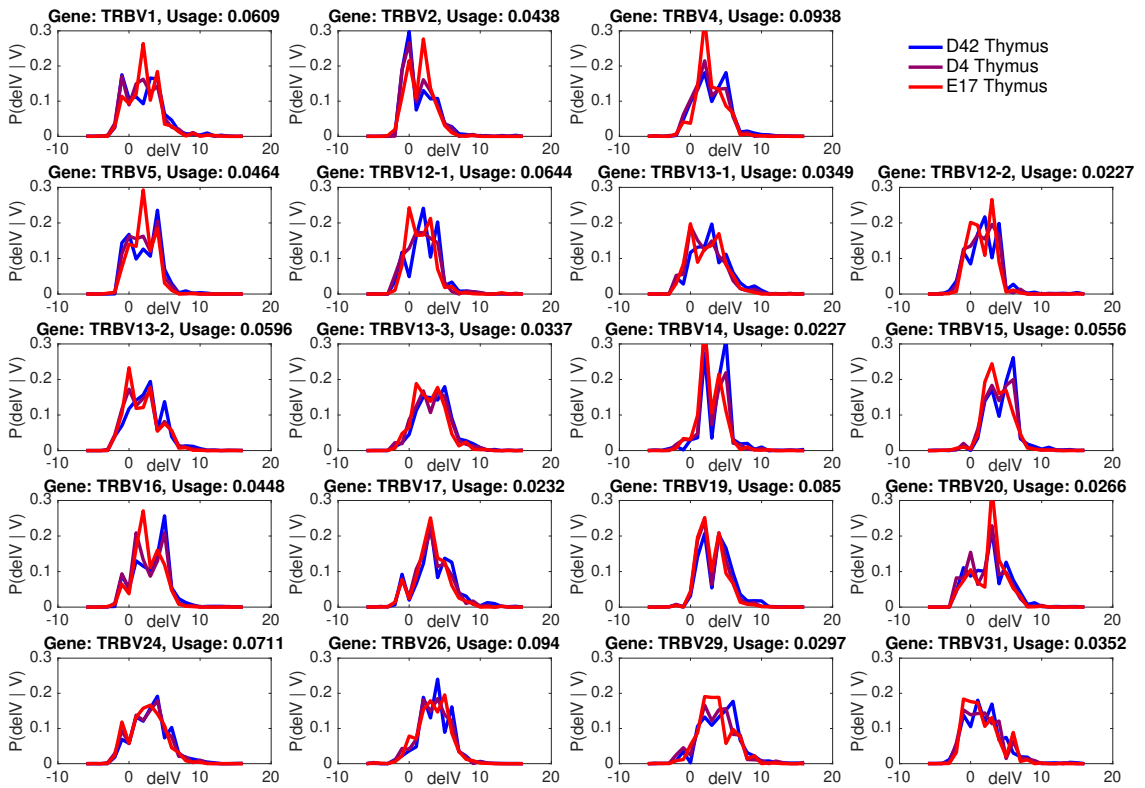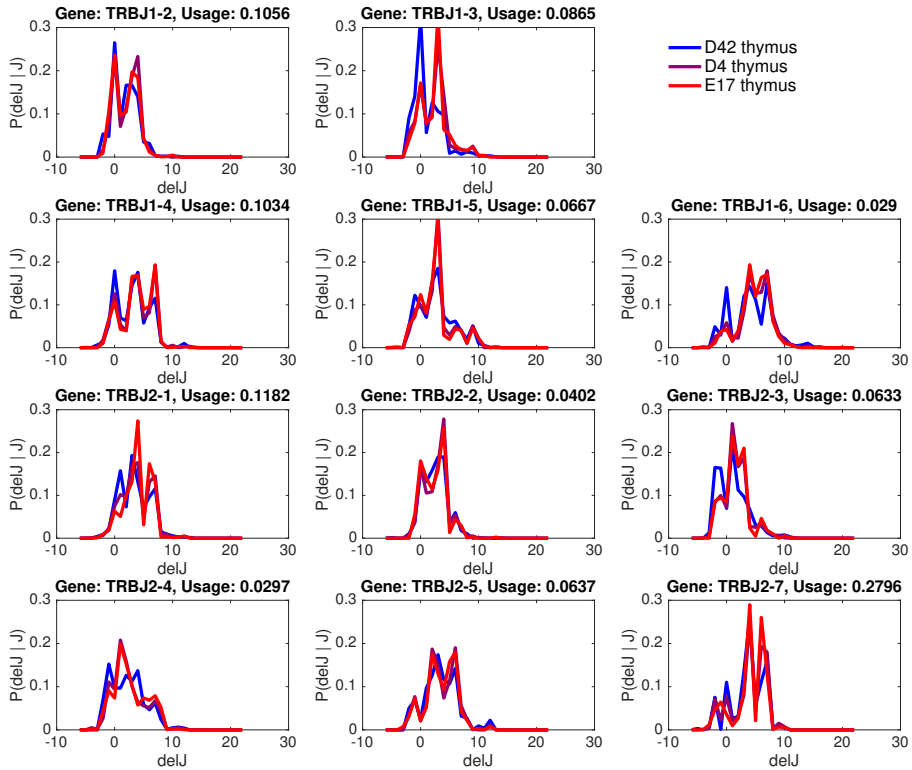

Supplement: pnas.1700241114.sfig03.pdf [file pnas.1700241114.sfig03.pdf]

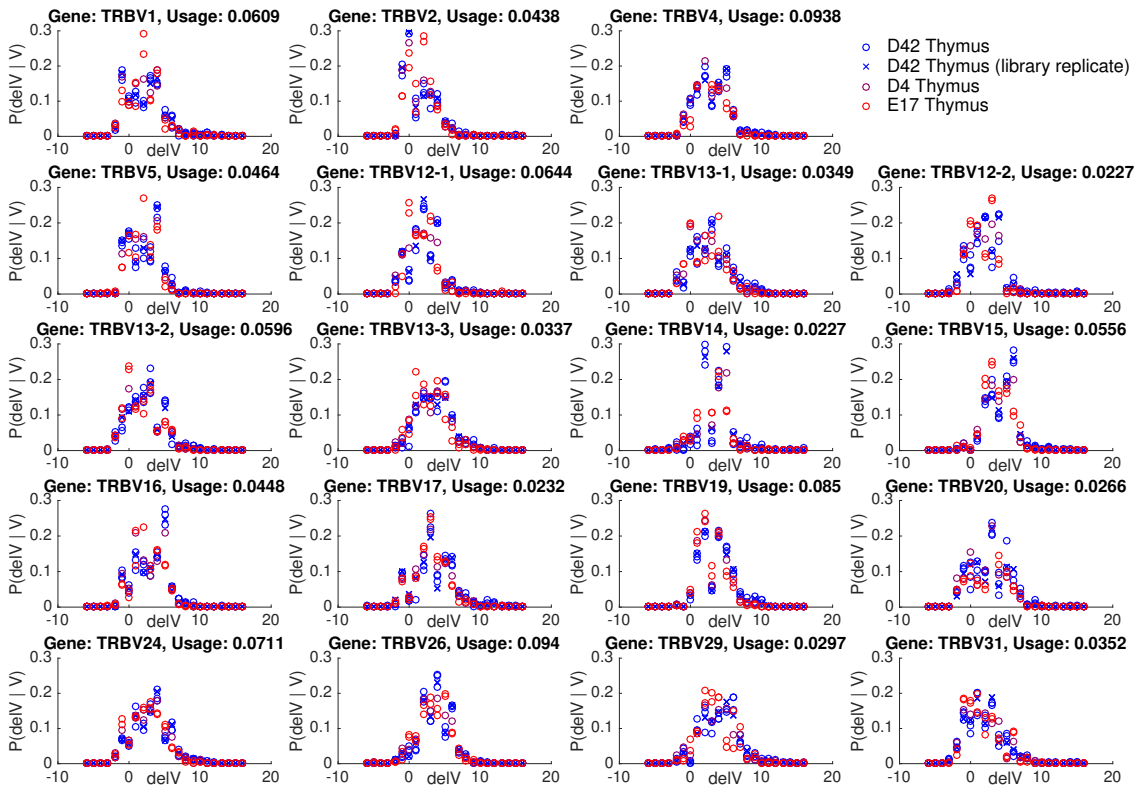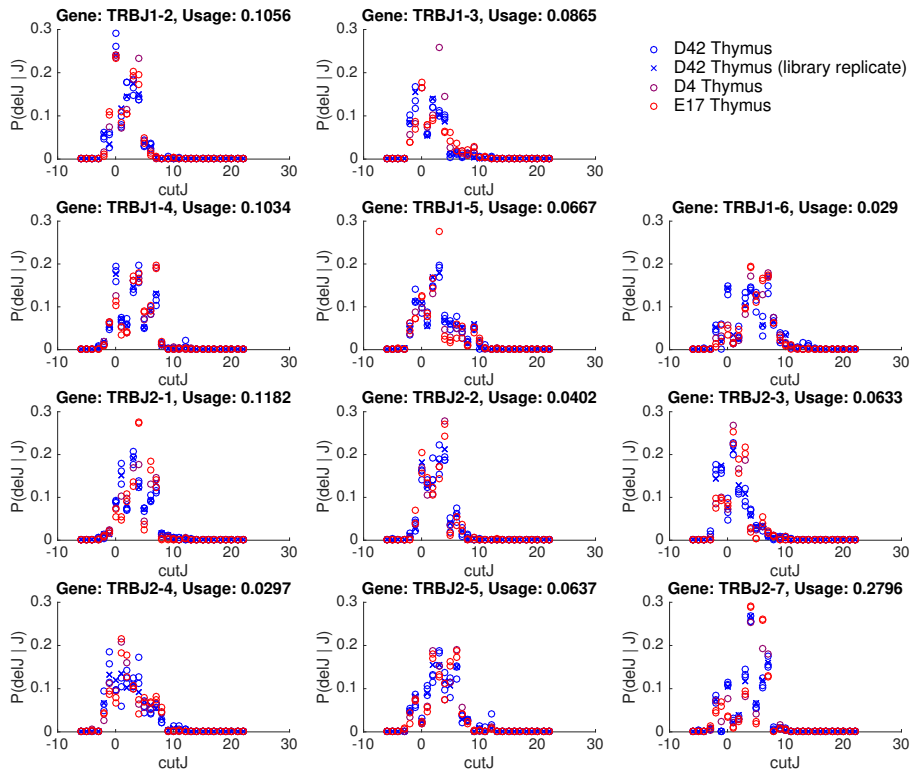

Supplement: pnas.1700241114.sfig04.pdf [file pnas.1700241114.sfig04.pdf]

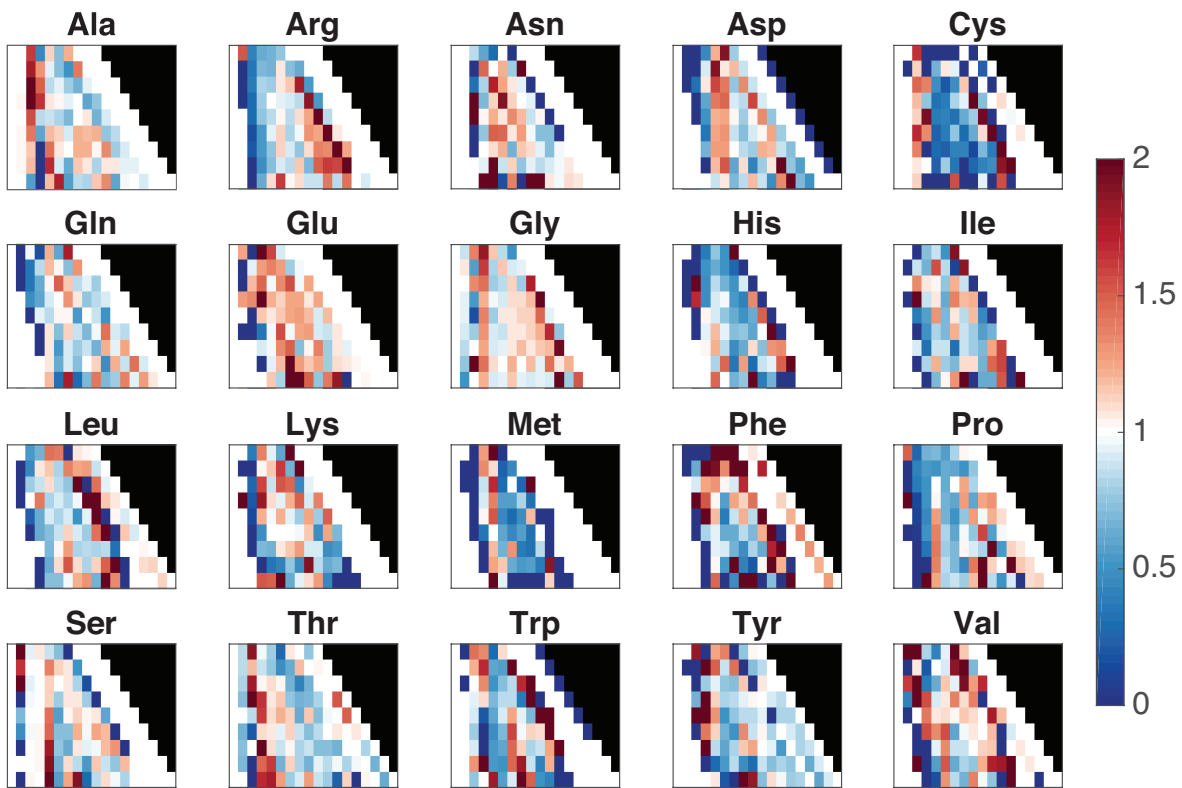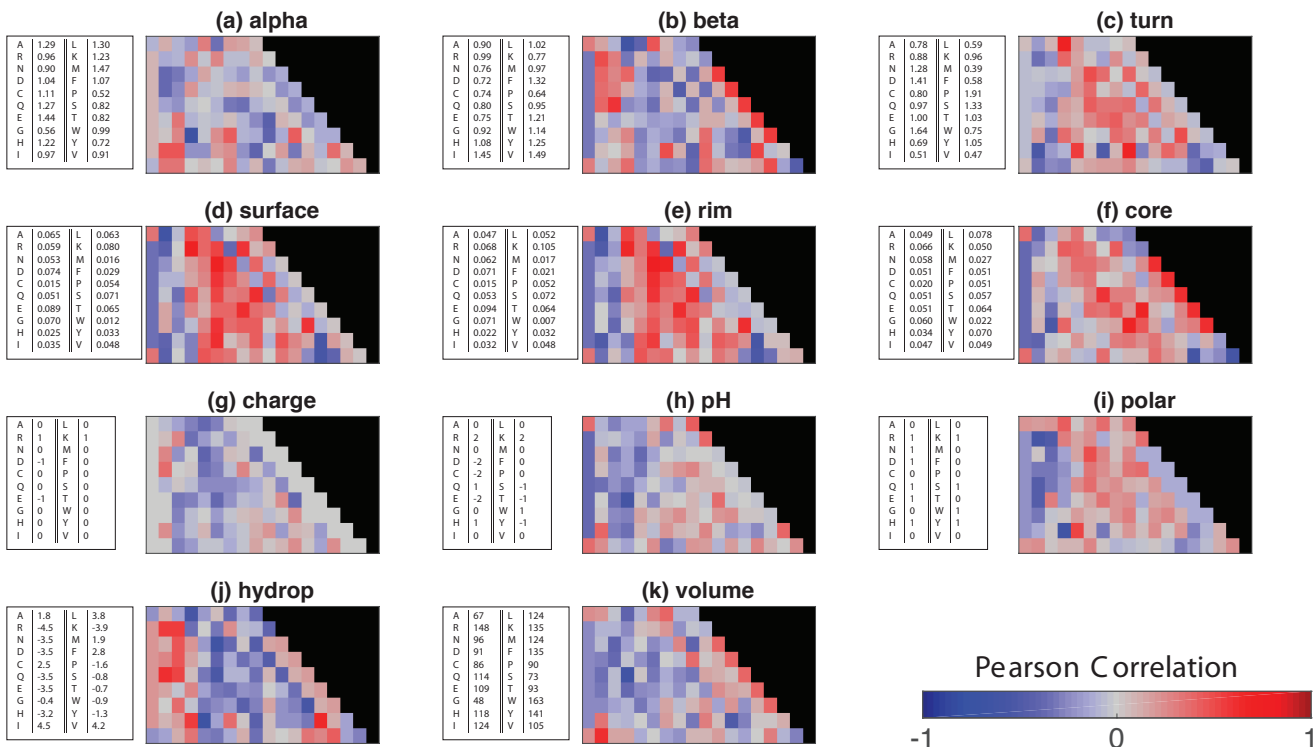

Supplement: pnas.1700241114.sfig06.pdf [file pnas.1700241114.sfig06.pdf]

### D42 blood1 Length 12

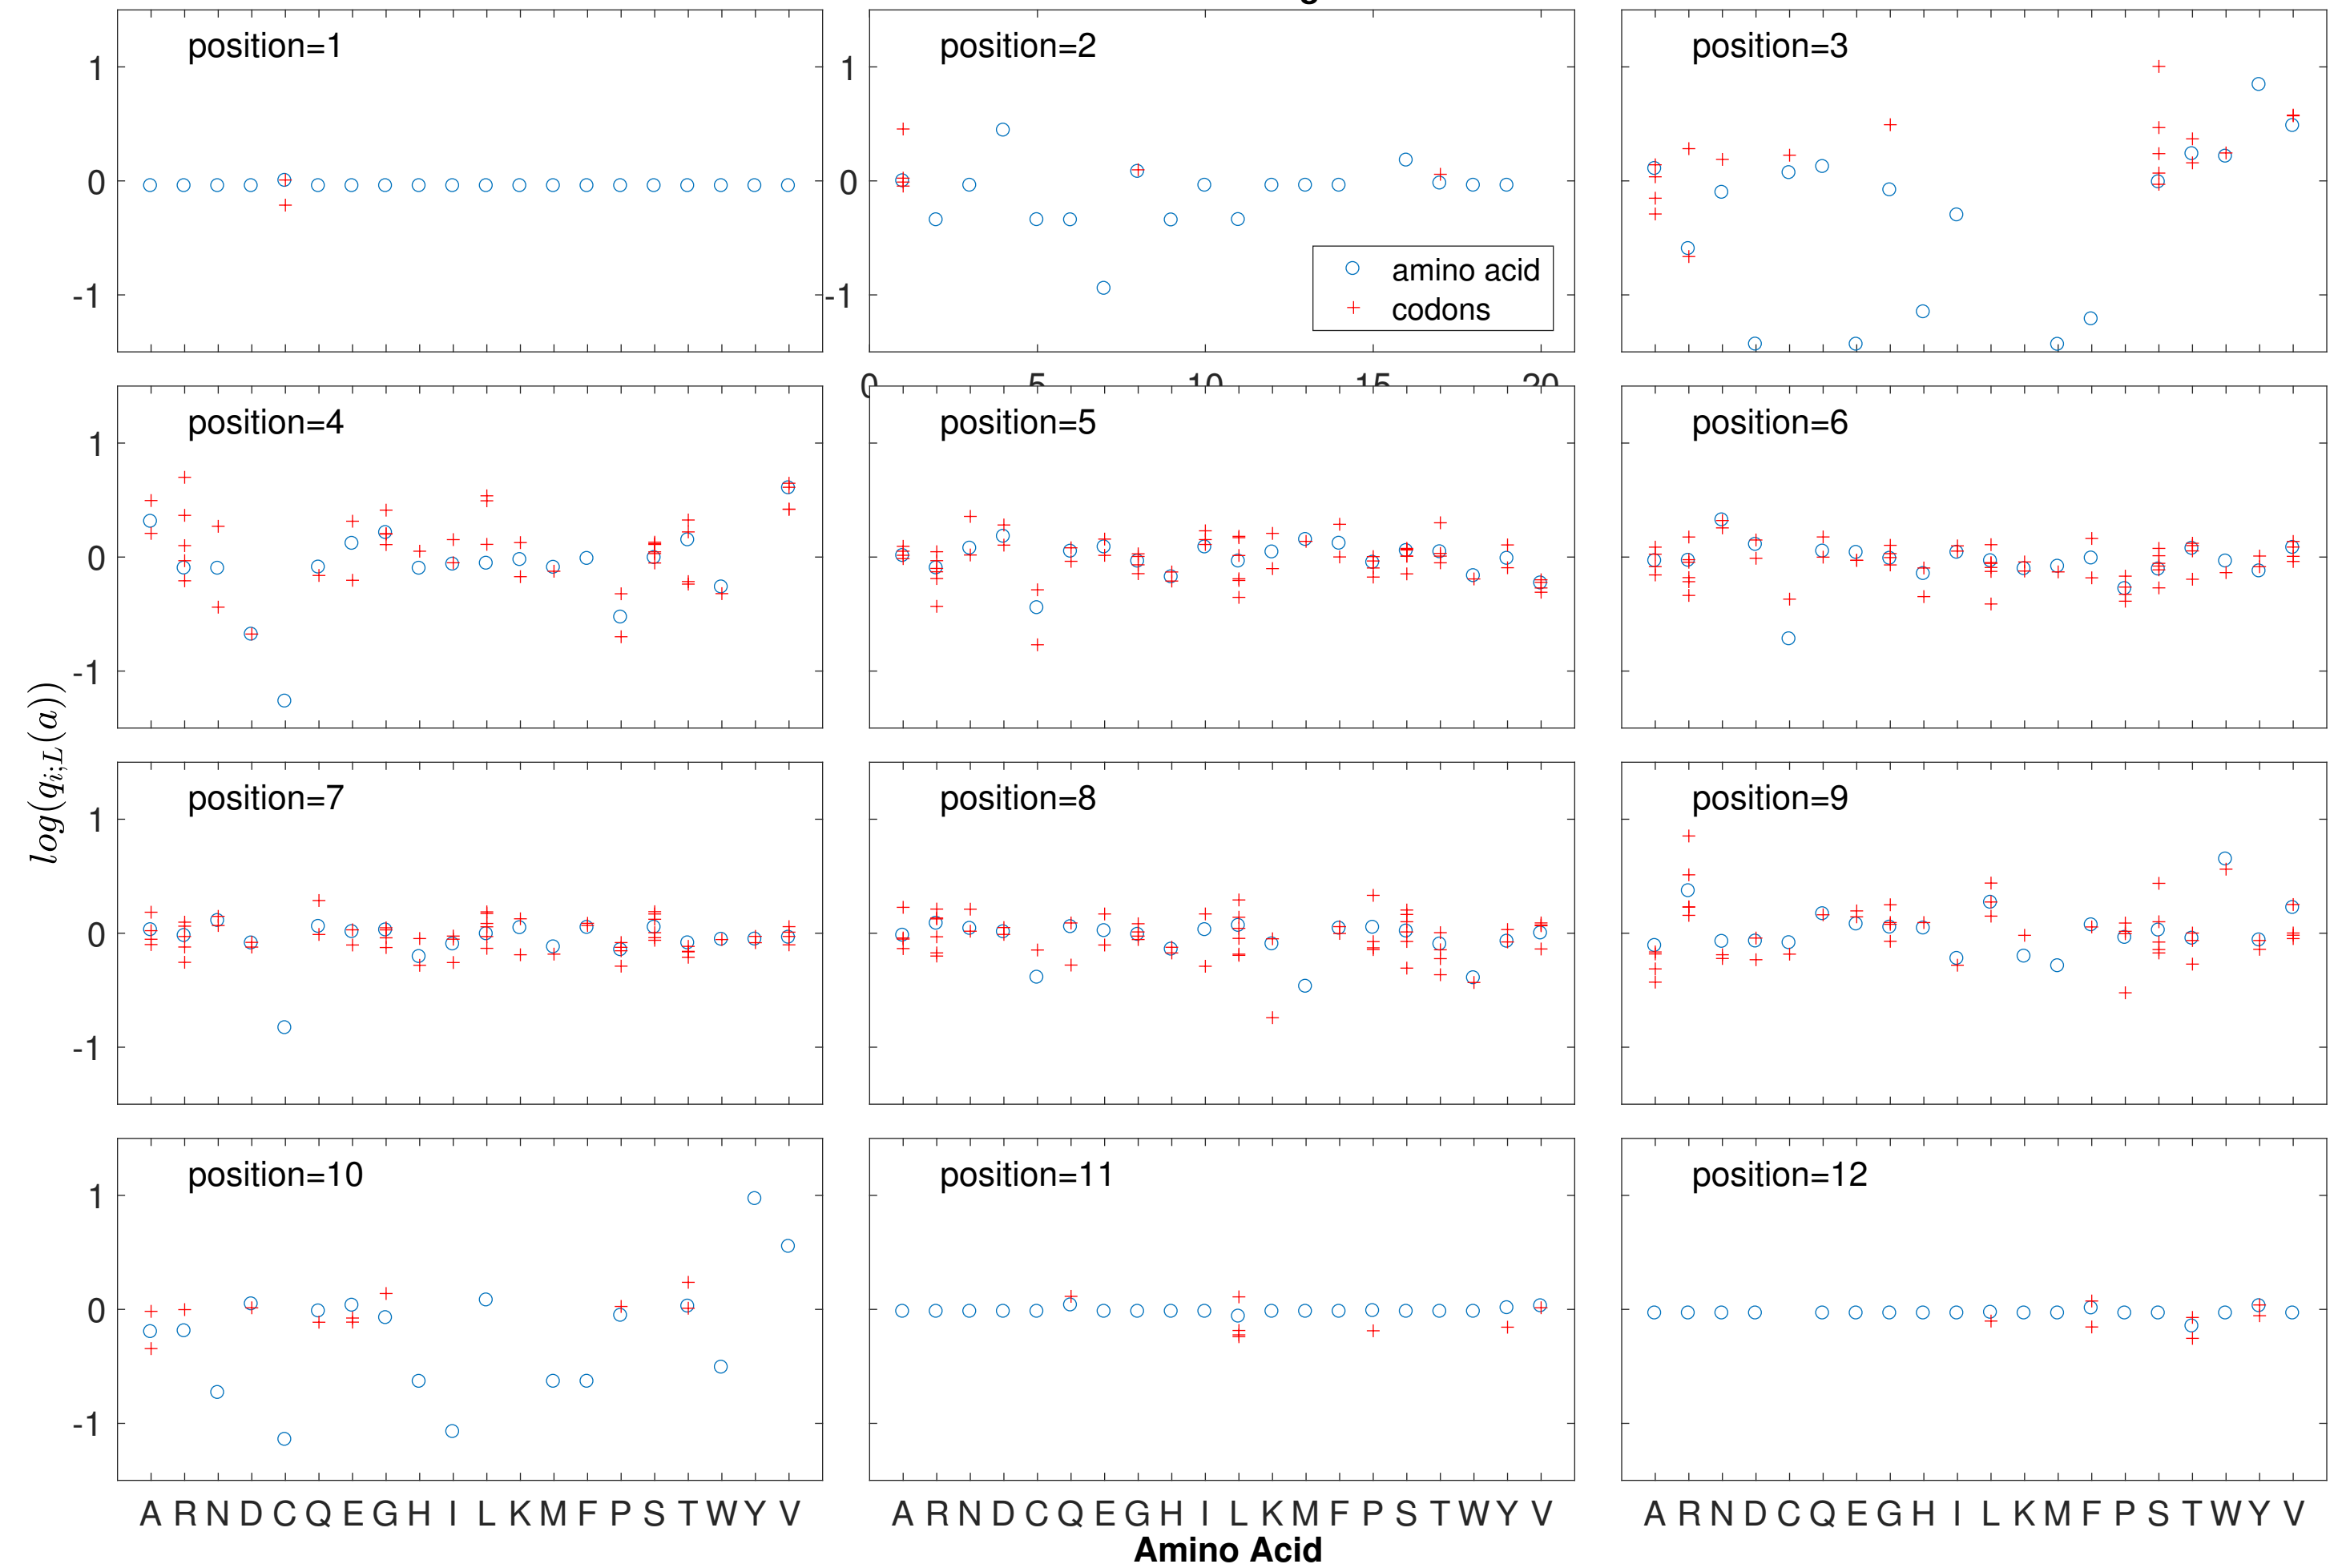

D42 thymus1 Length 12

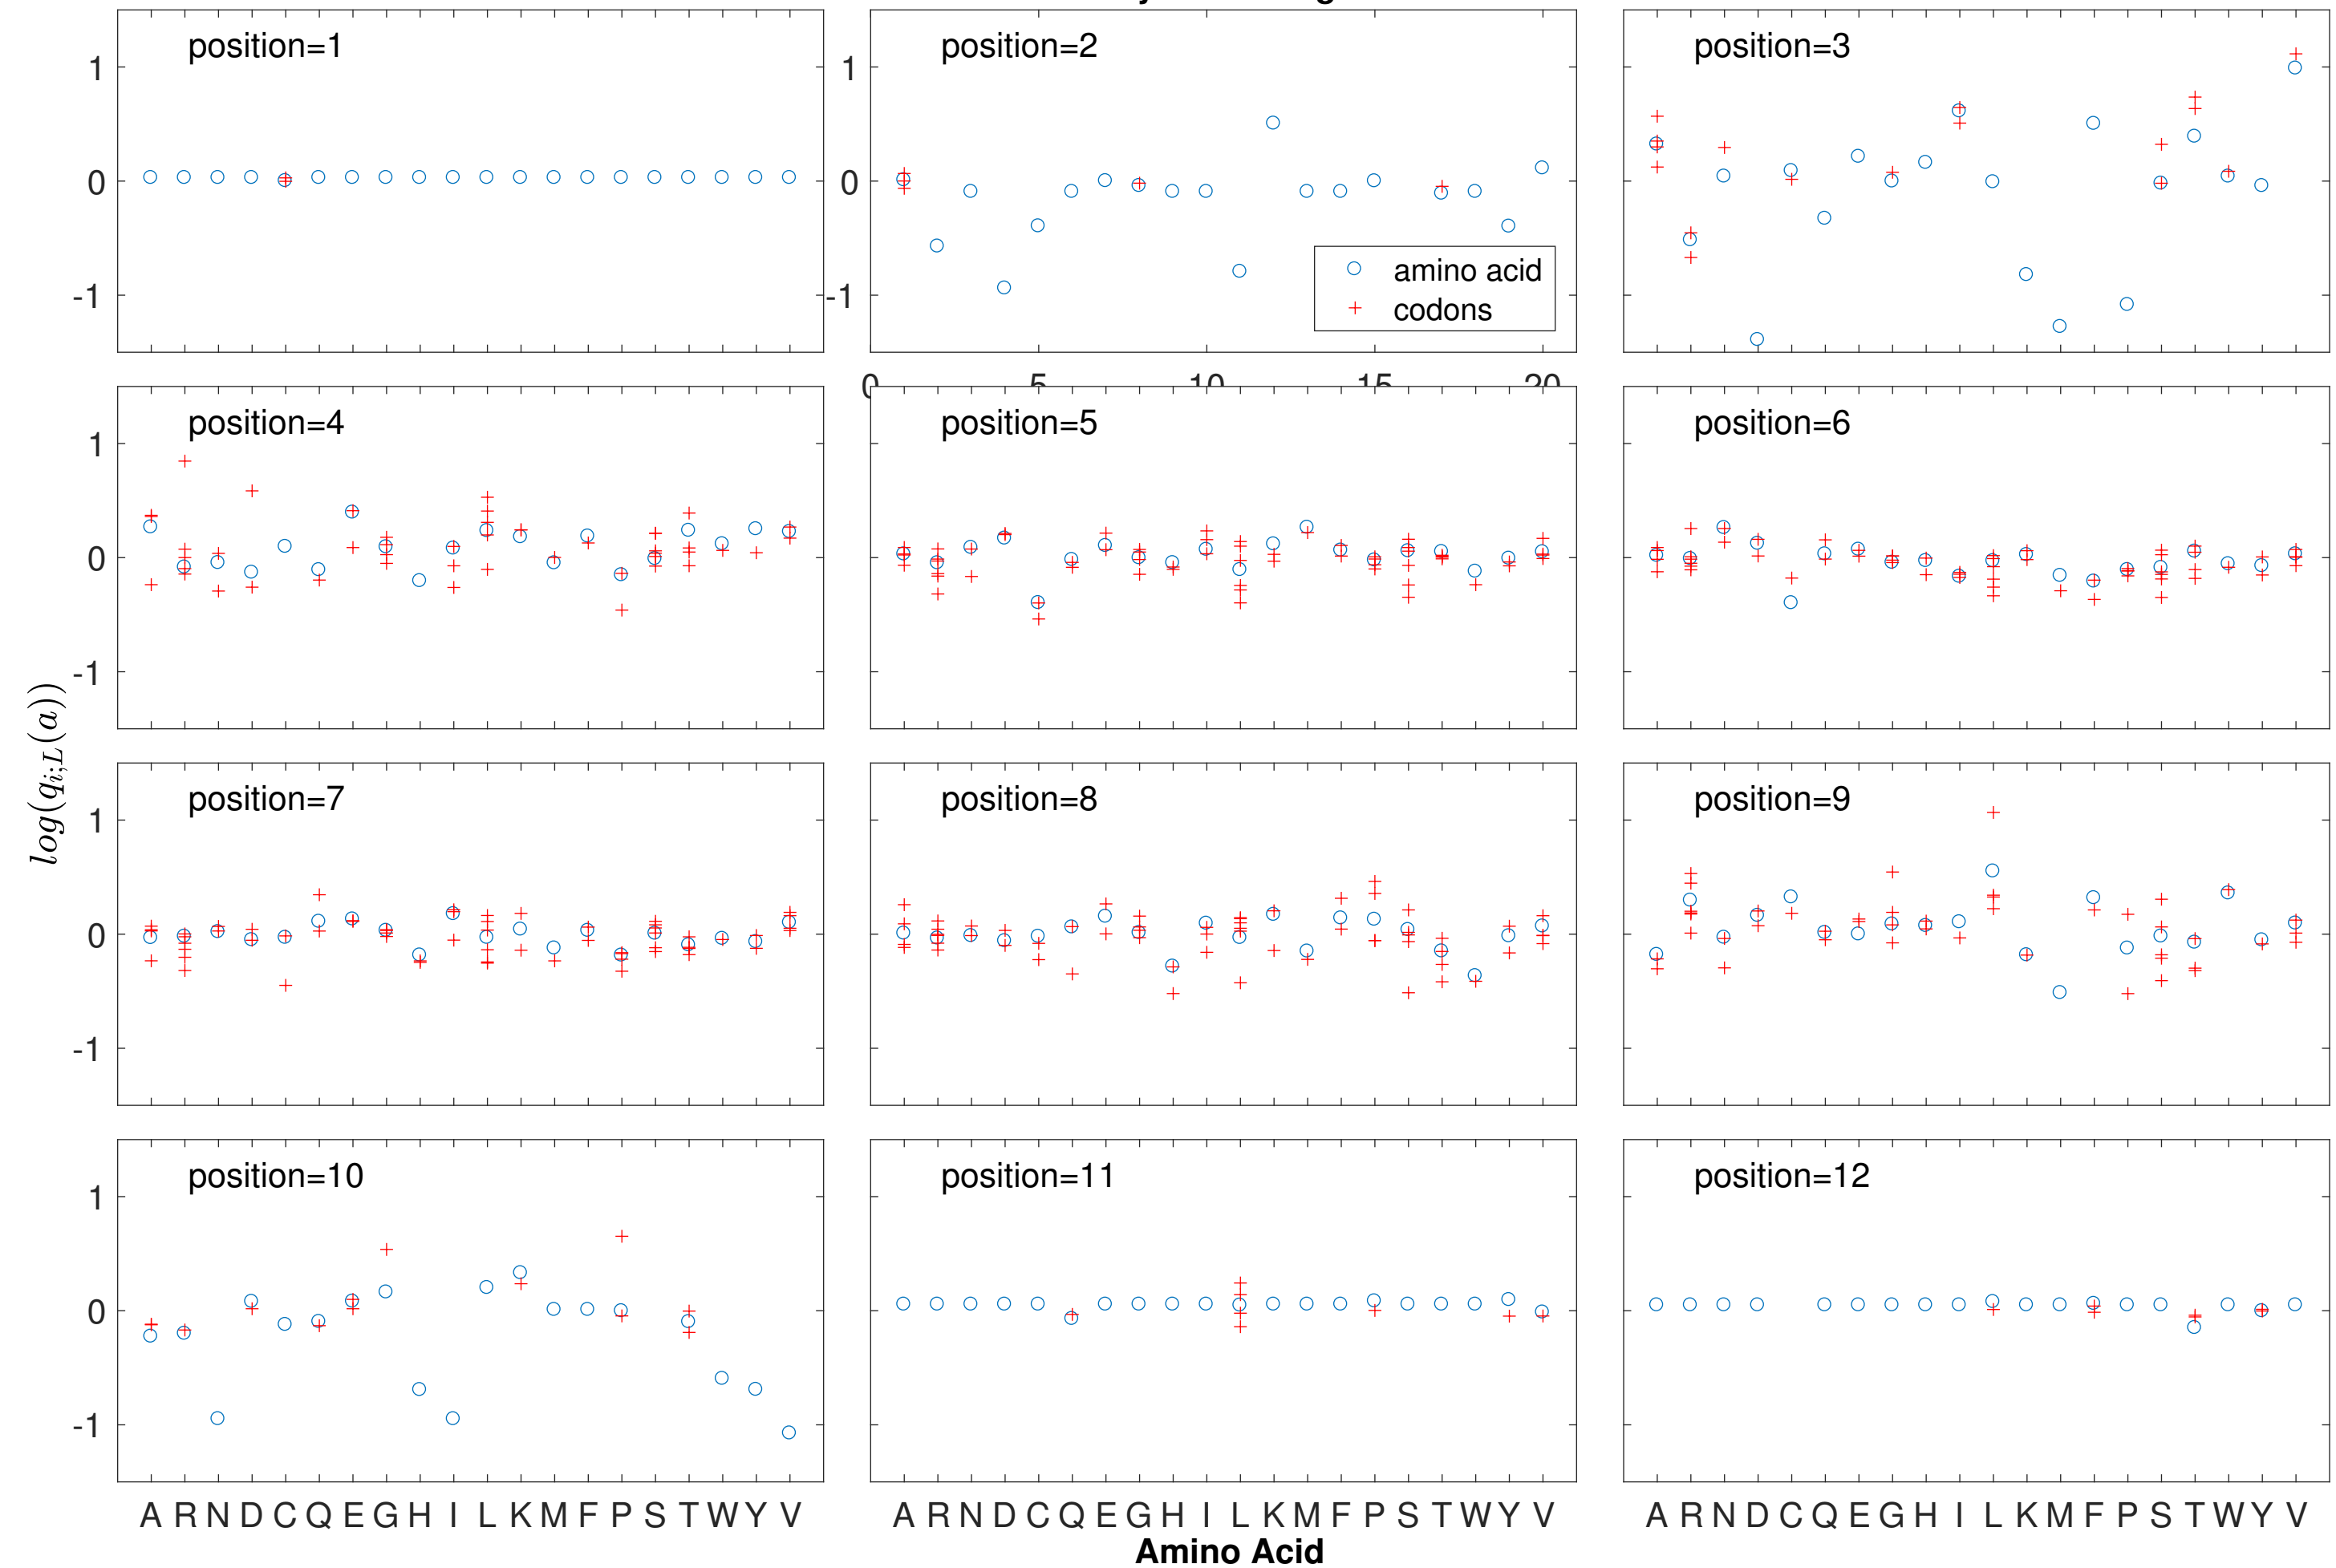

D42 thymus2 Length 12

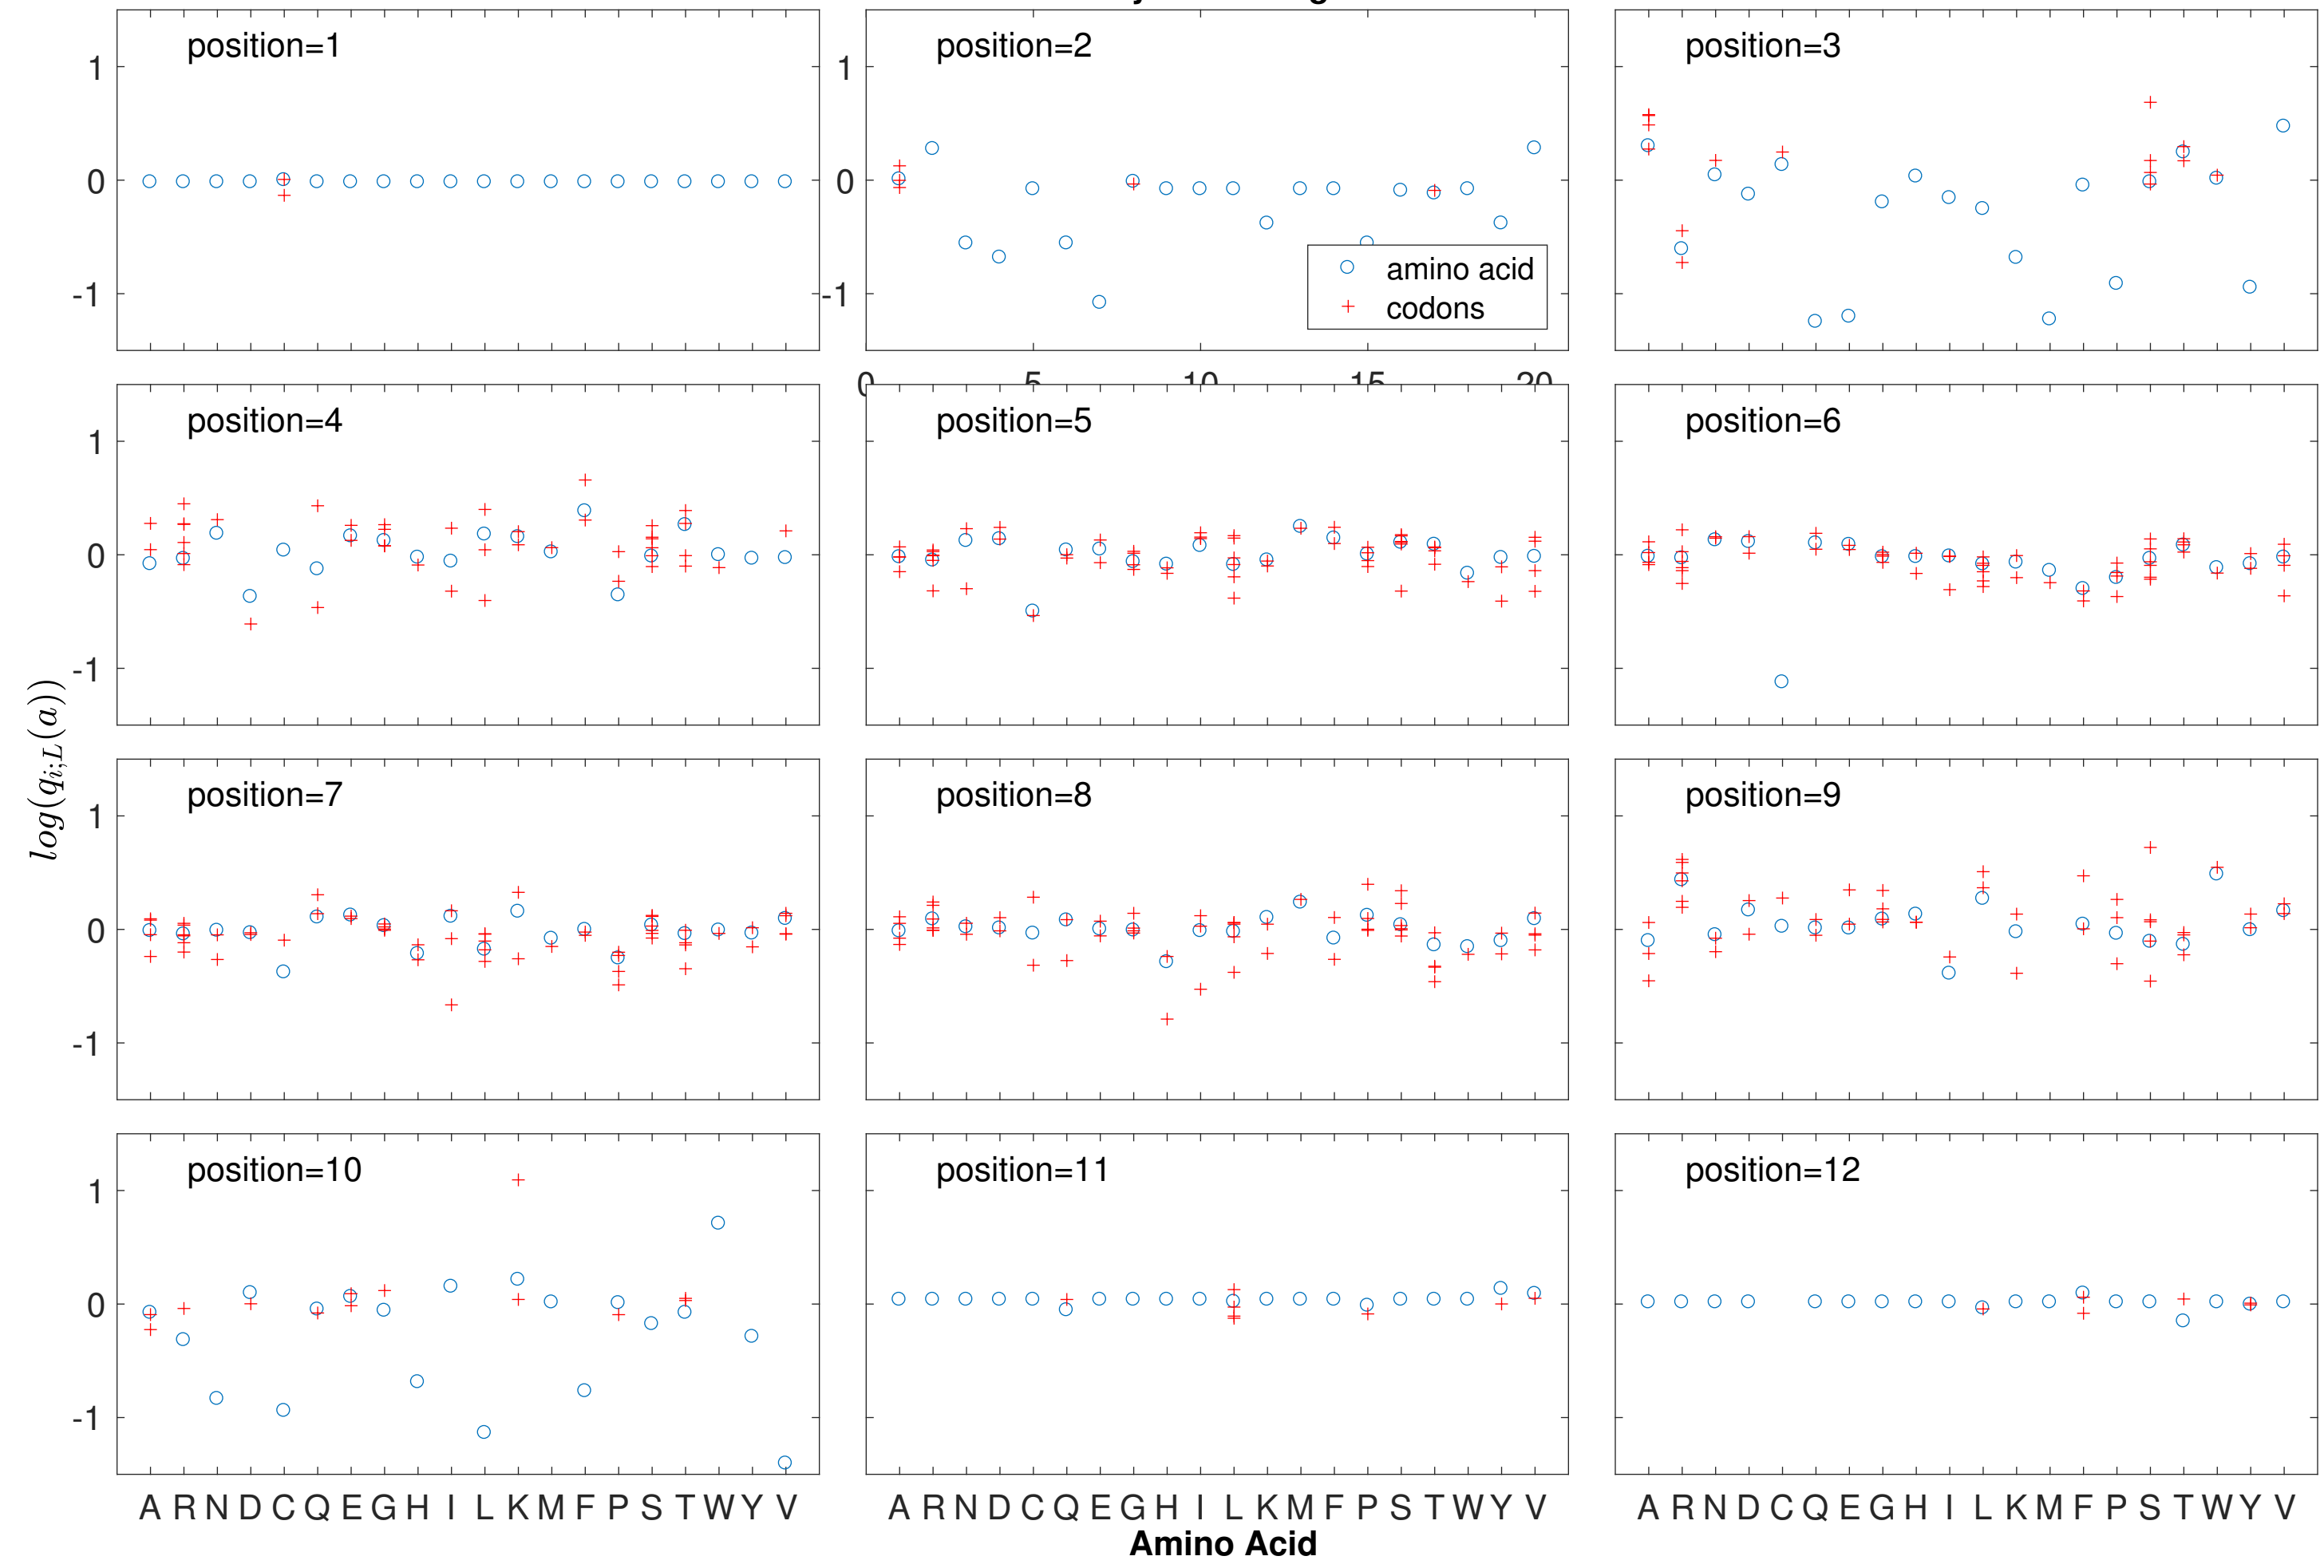

D42 thymus3 Length 12

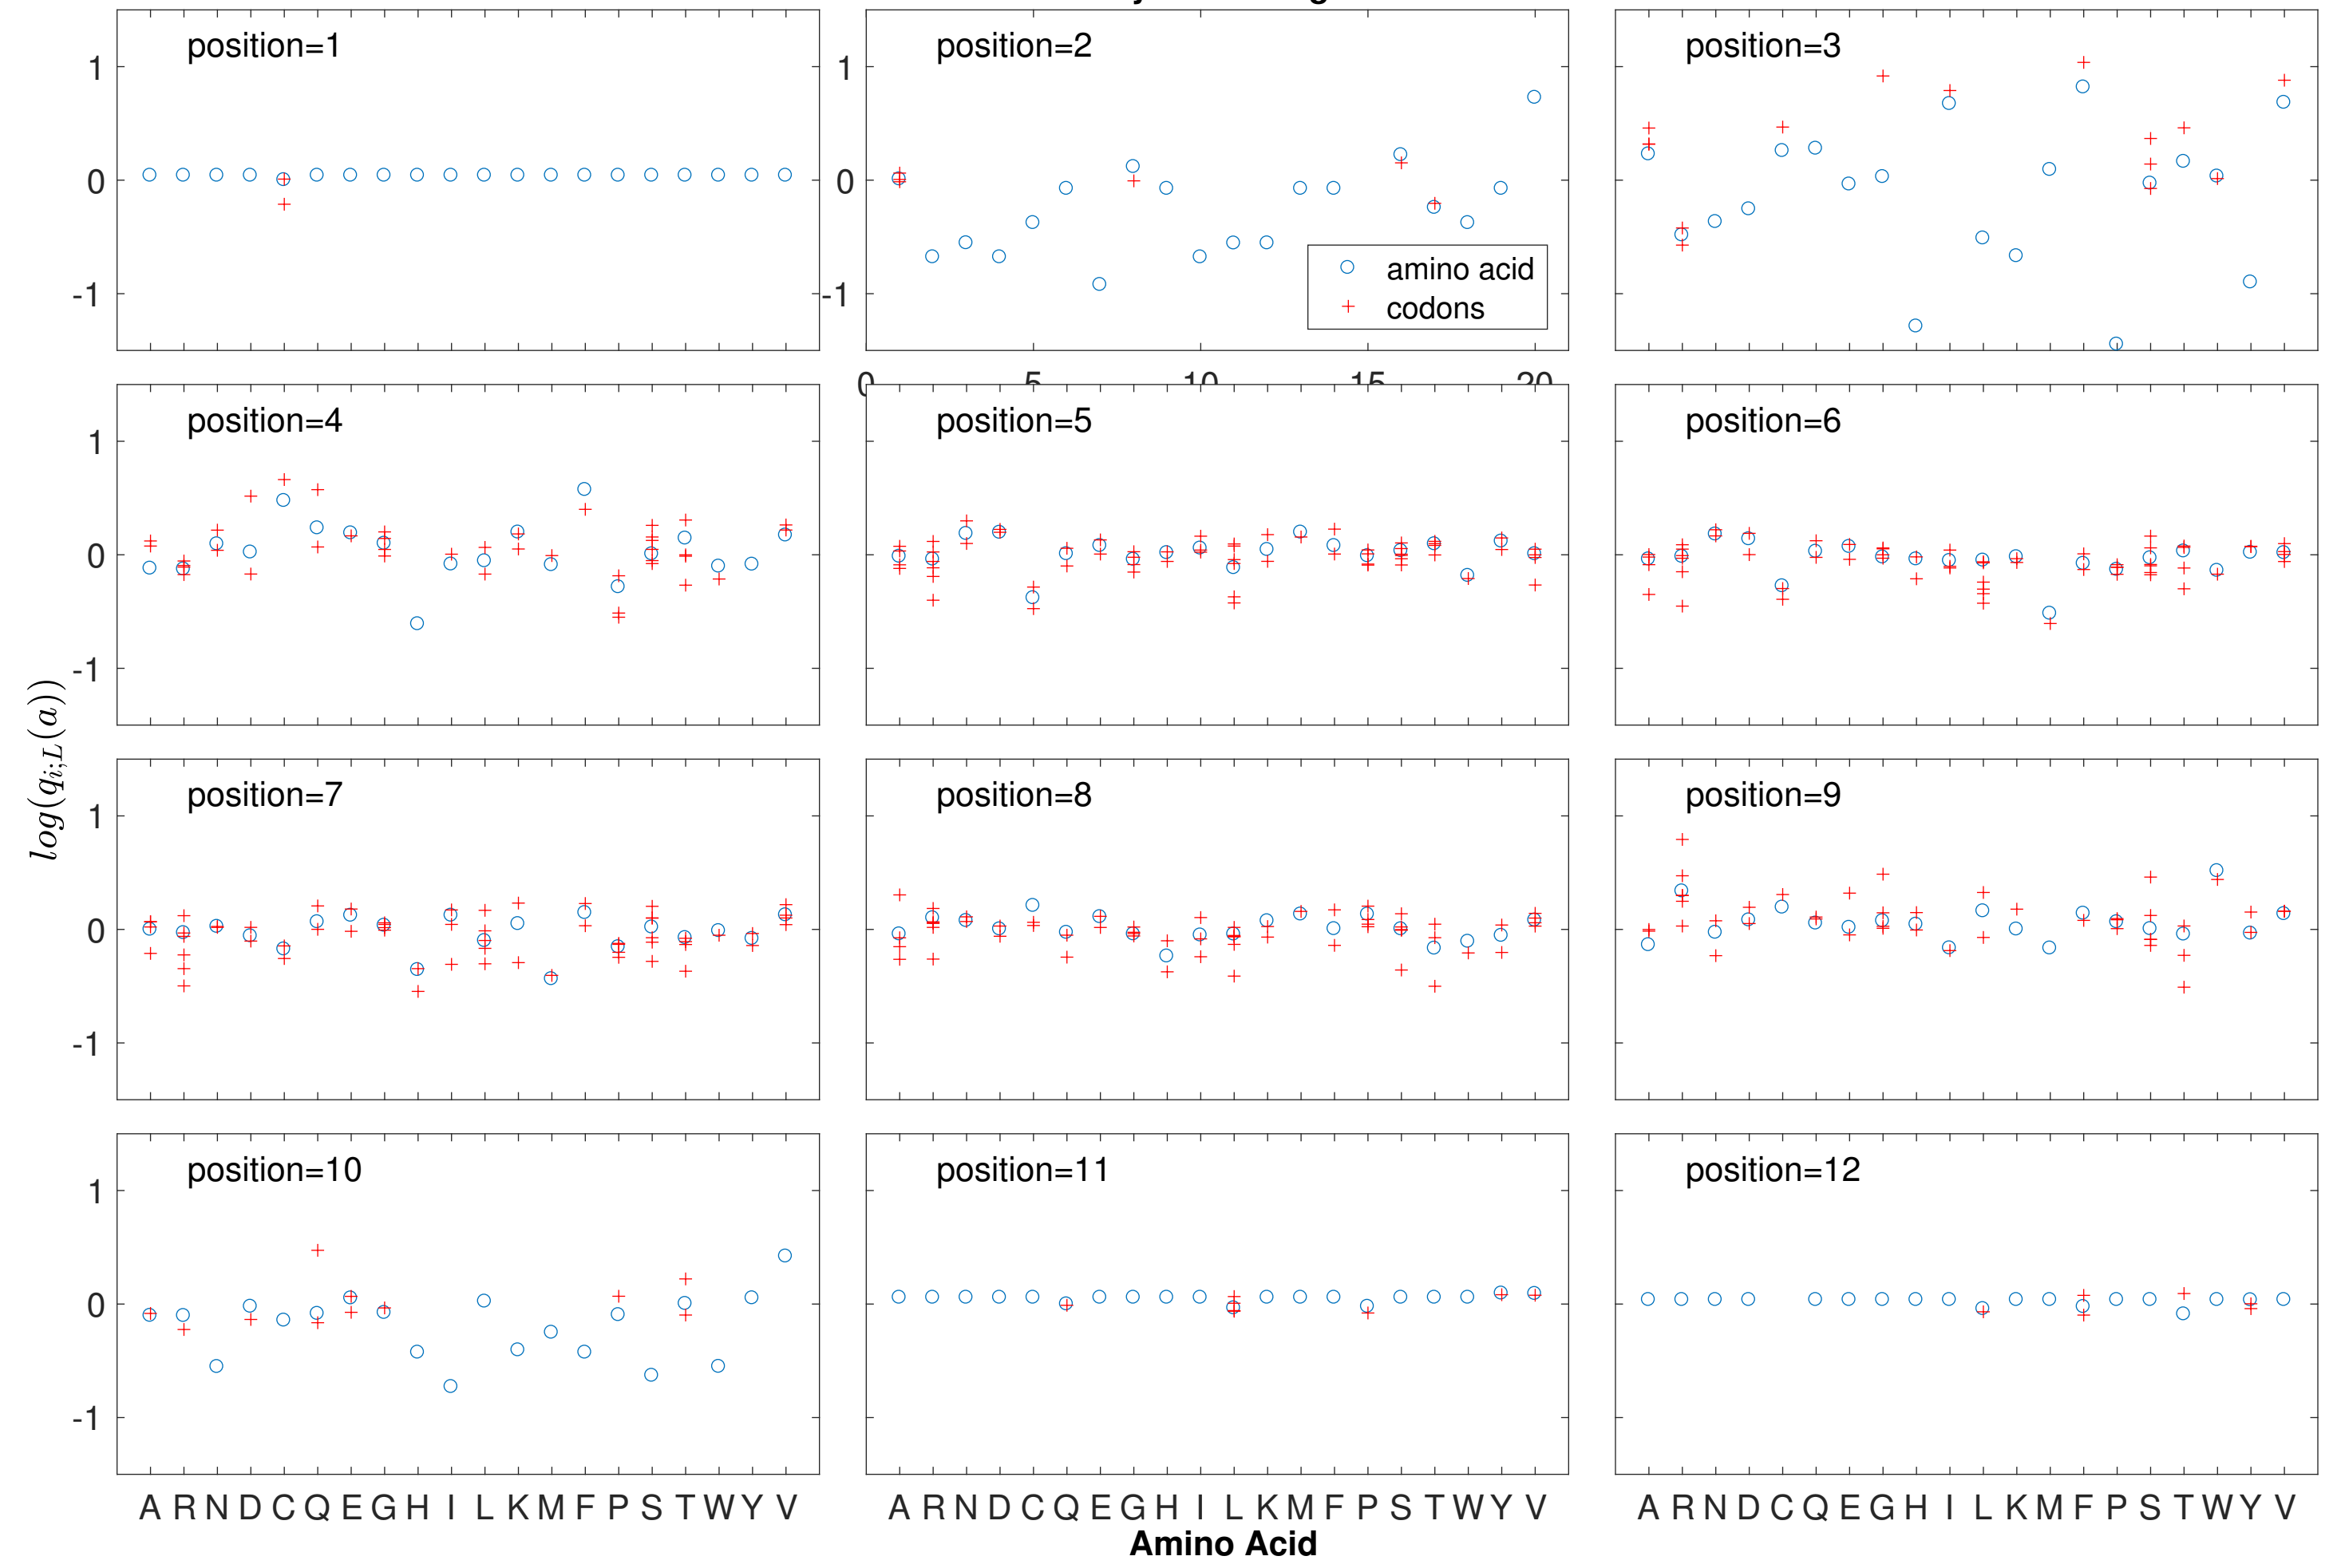

### E17 thymus2 Length 12

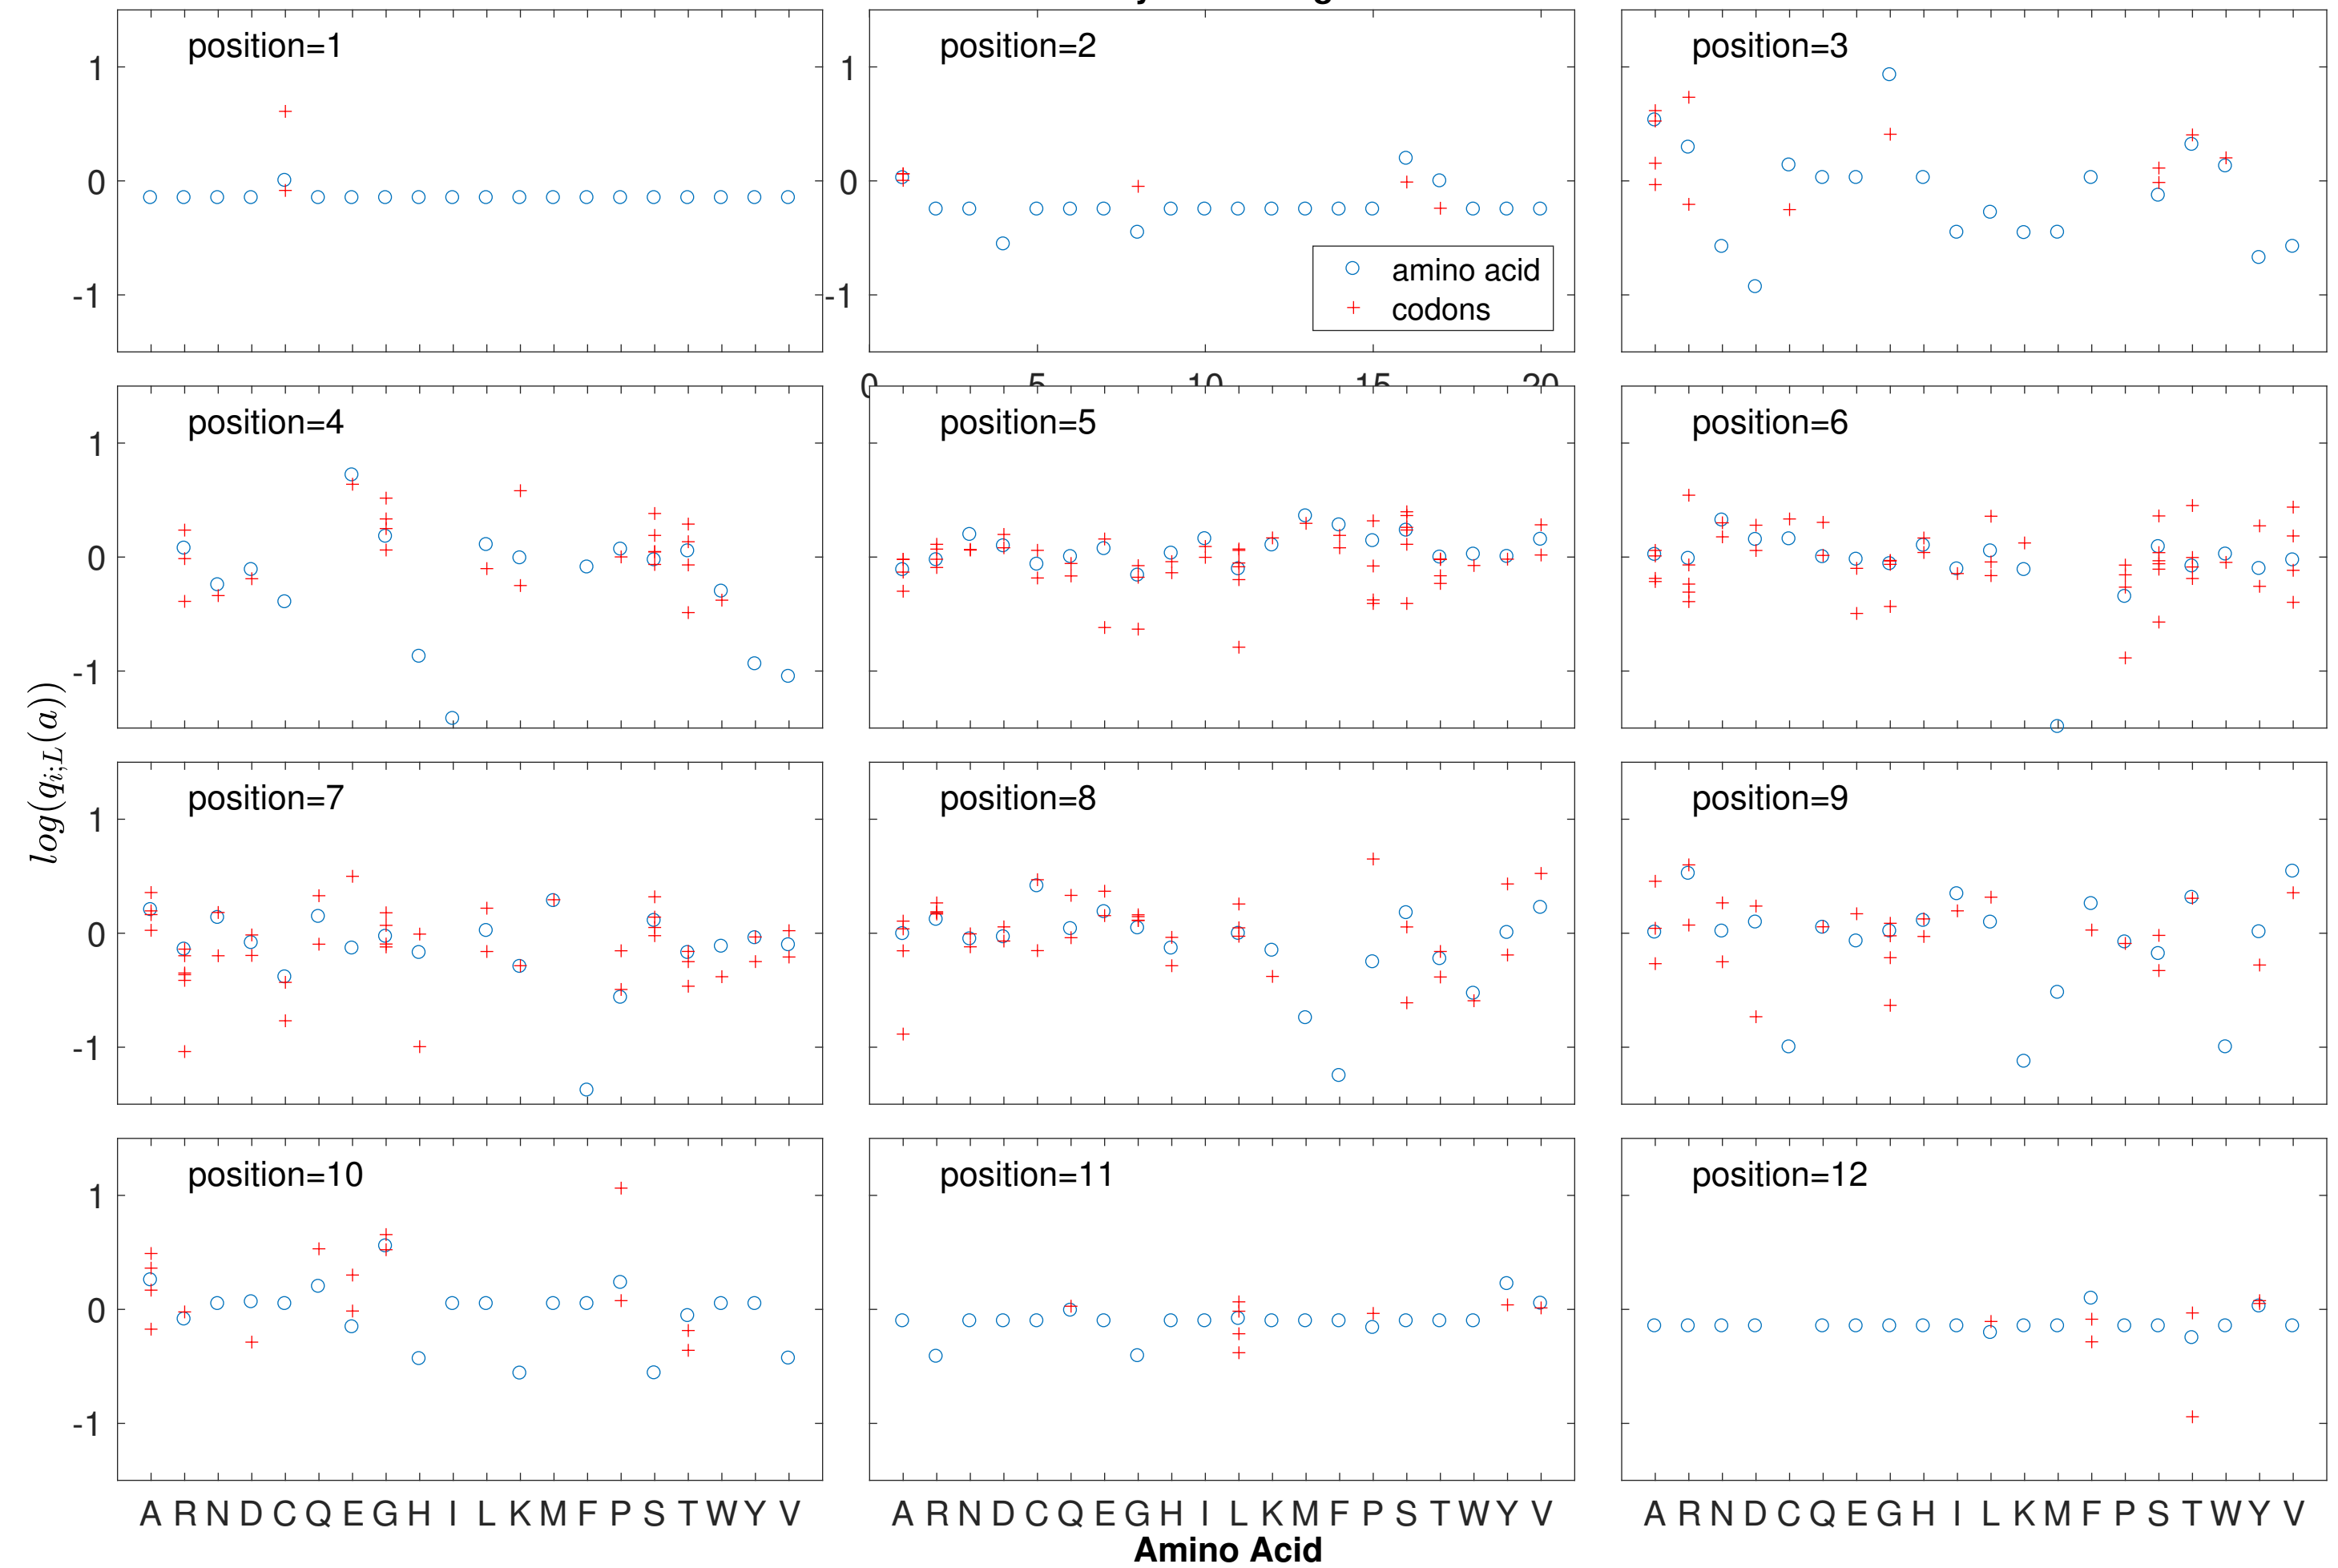

# E17 thymus3 Length 12

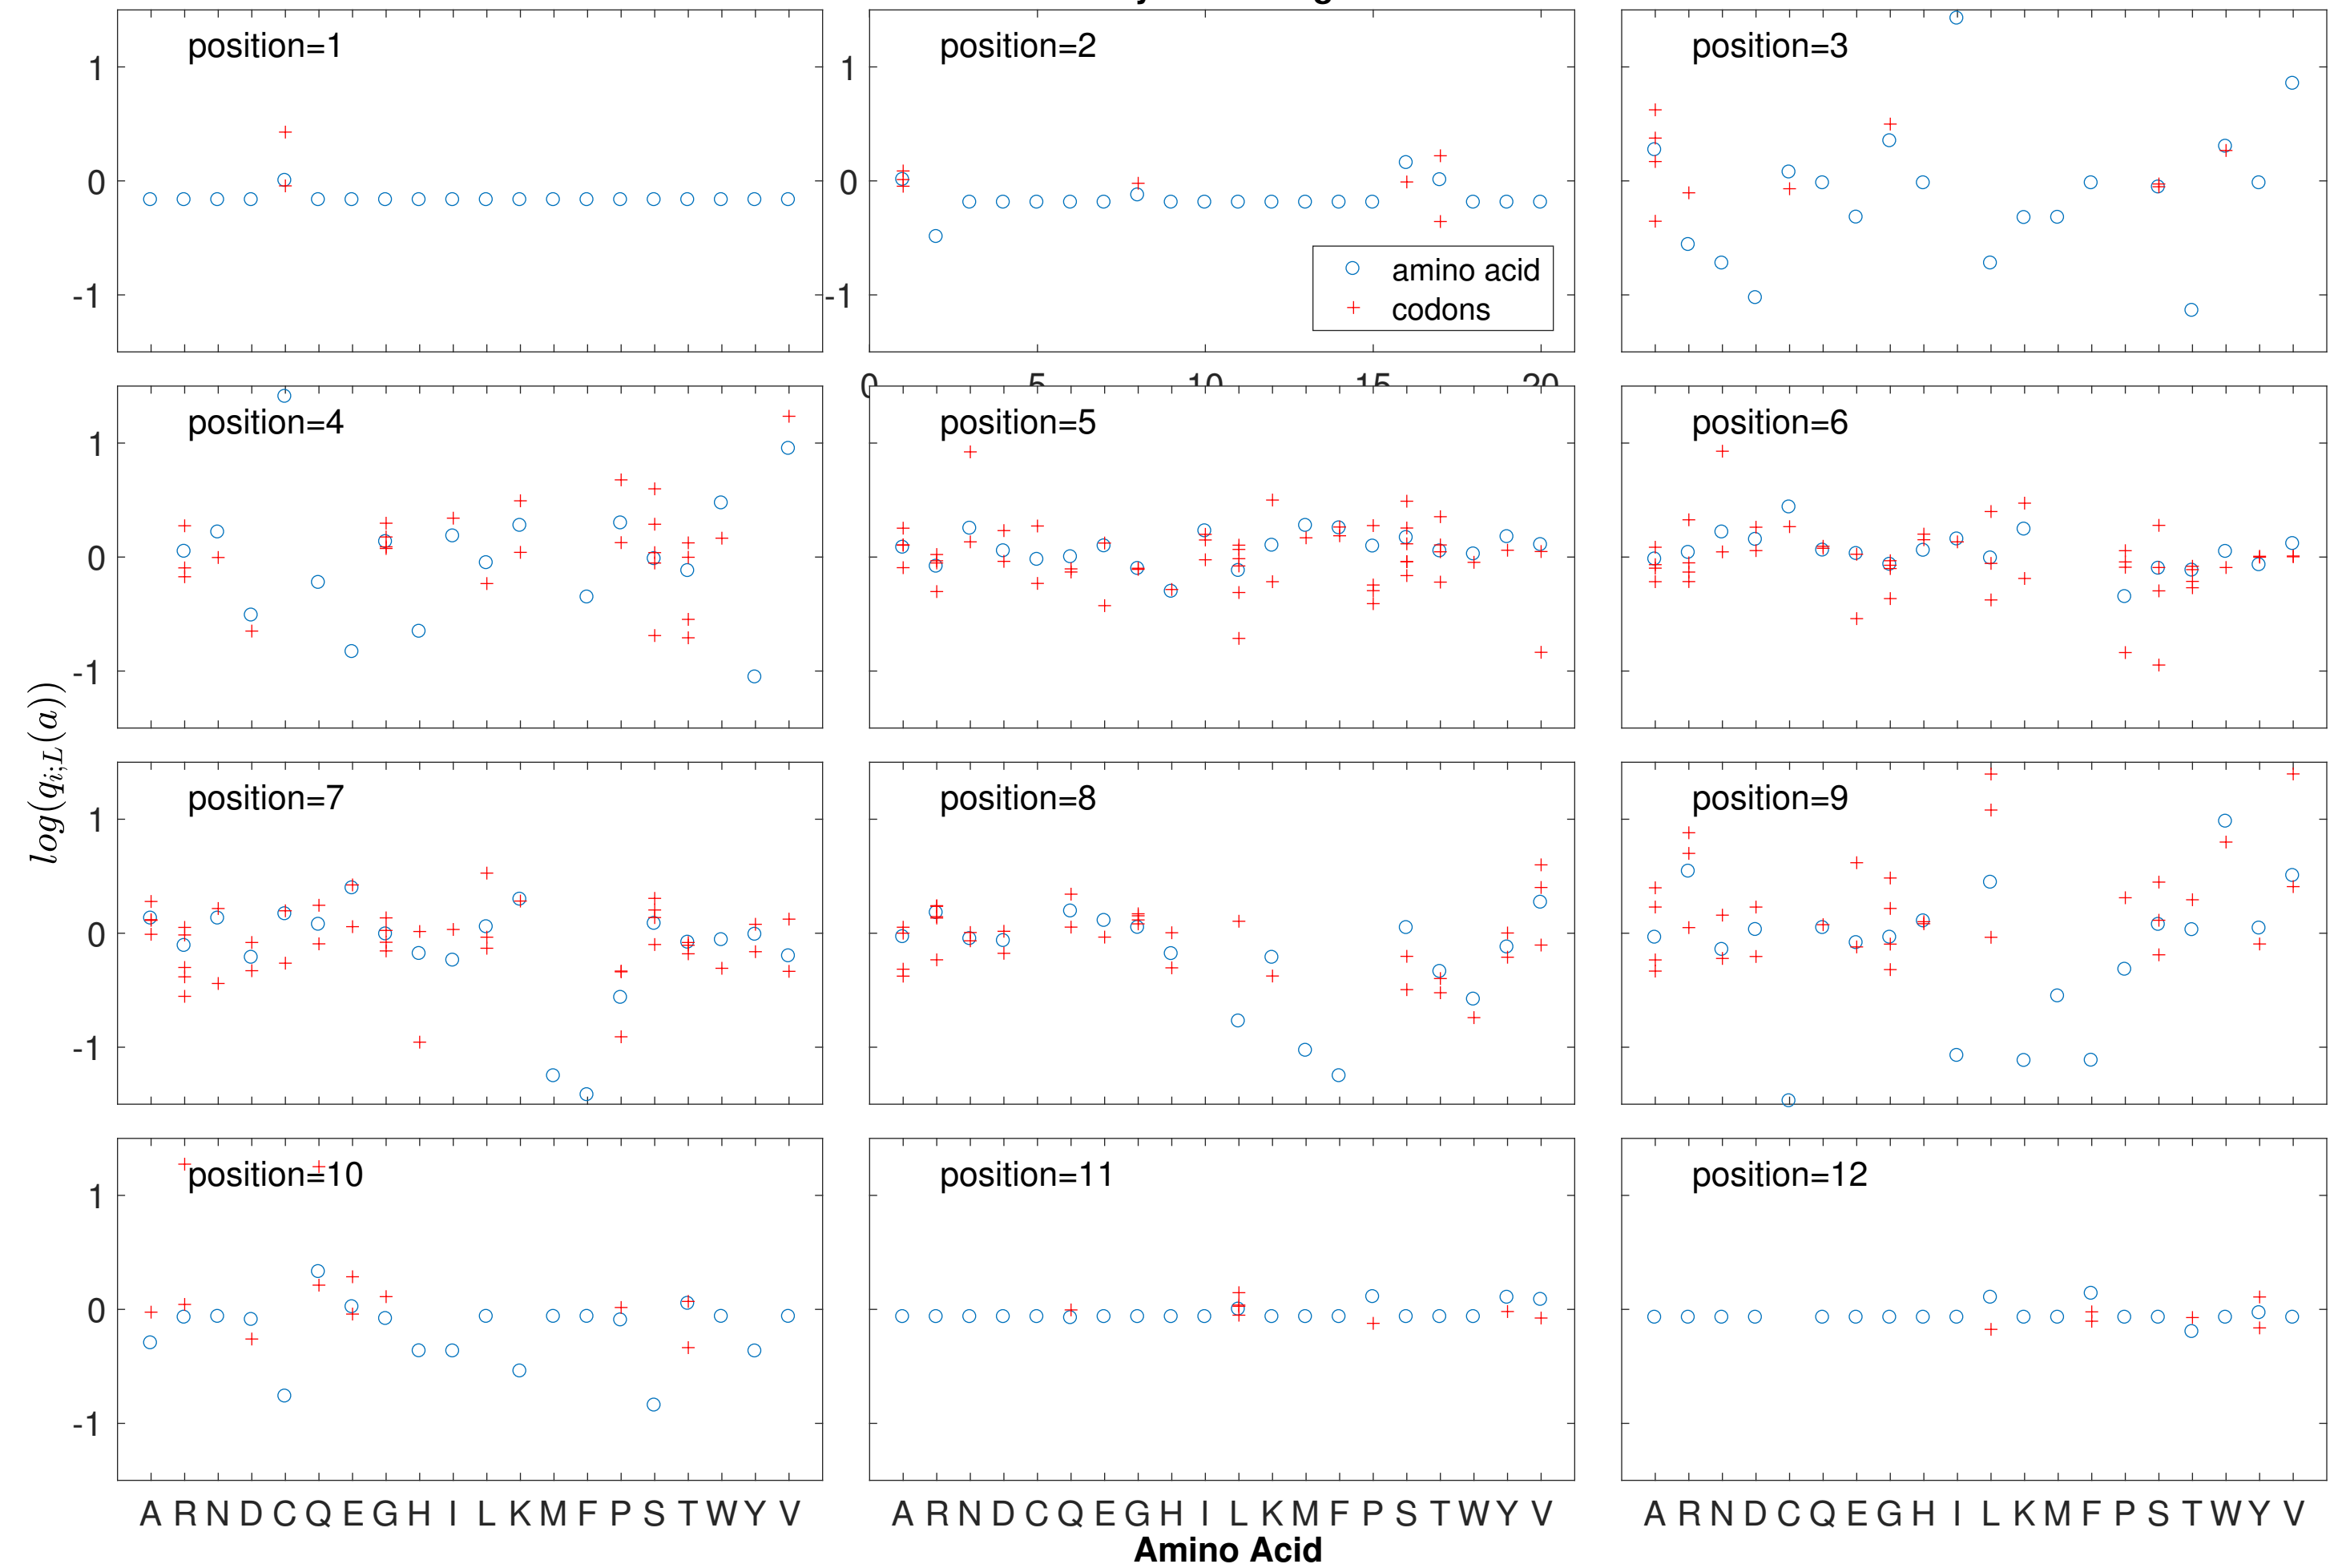

Supplement: pnas.1700241114.sfig10.pdf [file pnas.1700241114.sfig10.pdf]
